# Supplementary material for: Stability study and structural insights into cannabidiol cocrystals
Source: Royal Society of Chemistry journal article supplement (doi:10.1039/d4ce01314j), 2025-01-01
Supplement: d4ce01314j1.pdf [file d4ce01314j1.pdf]

# Stability Study and Structural Insights into Cannabidiol Cocrystals

## Supplementary Information

*Adéla Koryťáková<sup>1</sup>, Argyro Chatziadi<sup>1</sup>, Jan Rohlíček<sup>3</sup>, Eliška Skořepová<sup>3</sup>, Josef Beránek<sup>2</sup>,  
Miroslav Šoóš<sup>1,\*</sup>*

<sup>1</sup>University of Chemistry and Technology in Prague, Department of Chemical Engineering, Technická 3, 16628, Prague 6, Czech Republic

<sup>2</sup>Zentiva k.s., U Kabelovny 130, 10237, Prague 10, Czech Republic

<sup>3</sup>Institute of Physics of the Czech Academy of Sciences, Na Slovance 2, 182 00, Prague 8, Czech Republic

\*corresponding author

### SI 1 Single crystals measurement

Table SI 1. Crystallographic data and details of refinement of CBD cocrystals

|                   | <b>CBD-BP</b>                                                 | <b>CBD-CR</b>                                         | <b>CBD-PR</b>                                   |
|-------------------|---------------------------------------------------------------|-------------------------------------------------------|-------------------------------------------------|
| Sample            | Single crystal                                                | Powder                                                | Single crystal                                  |
| Empirical formula | C <sub>31</sub> H <sub>38</sub> N <sub>2</sub> O <sub>2</sub> | C <sub>28</sub> H <sub>45</sub> NO <sub>4</sub>       | C <sub>26</sub> H <sub>39</sub> NO <sub>4</sub> |
| Formula weight    | 470.65                                                        | 475.7                                                 | 429.6                                           |
| Crystal system    | Monoclinic                                                    | Orthorhombic                                          | Orthorhombic                                    |
| Space group       | <i>P</i> 2 <sub>1</sub>                                       | <i>P</i> 2 <sub>1</sub> 2 <sub>1</sub> 2 <sub>1</sub> | <i>P</i> 2 <sub>2</sub> 1 <sub>2</sub> 1        |
| T (K)             | 95                                                            | 293                                                   | 95                                              |
| Radiation         | Cu <i>K</i> α                                                 | Cu <i>K</i> α1                                        | Cu <i>K</i> α                                   |
| a (Å)             | 9.9190 (2)                                                    | 20.0237 (6)                                           | 8.9467 (1)                                      |
| b (Å)             | 18.6995 (4)                                                   | 17.0222 (5)                                           | 16.7061 (3)                                     |
| c (Å)             | 14.2034 (3)                                                   | 8.20215 (19)                                          | 32.6593 (5)                                     |
| α (°)             | 90                                                            | 90                                                    | 90                                              |
| β (°)             | 91.711 (2)                                                    | 90                                                    | 90                                              |

|                                                                            |                |                     |                |
|----------------------------------------------------------------------------|----------------|---------------------|----------------|
| $\gamma$ ( $^{\circ}$ )                                                    | 90             | 90                  | 90             |
| V ( $\text{\AA}^3$ )                                                       | 2633.28 (10)   | 2795.68 (13)        | 4881.40 (13)   |
| Z                                                                          | 4              | 4                   | 8              |
| Reflns. collected                                                          | 19066          | -                   | 36993          |
| Indep. reflns                                                              | 9315           | -                   | 9678           |
| GOF                                                                        | 0.9309         | 4.6825              | 1.0315         |
| $R_1, wR_2$ [ $I > 2\delta(I)$ ]                                           | 0.0585, 0.1533 | 0.0675, 0.0803      | 0.0446, 0.1115 |
| $R_1, wR_2$ (all data)                                                     | 0.0678, 0.1573 | 0.0699, 0.0805      | 0.0482, 0.1137 |
| $\Delta\rho_{\text{max}}, \Delta\rho_{\text{min}}$ ( $e \text{\AA}^{-3}$ ) | 0.39, -0.38    | 0.18, -0.23         | 0.24, -0.23    |
| $R_p, R_{wp}, R_{\text{exp}}$                                              | -              | 0.025, 0.036, 0.008 | -              |
| CCDC number                                                                | 2333022        | 2333084             | 2333083        |

The crystal structure of CBD-CR was solved using the direct space approach implemented in the program FOX [1], where model of CBD was used from the CSD entry with ref. code CANDOM12 and carnitine was modelled using the online tool molview. The Rietveld refinement was made in Jana2020 [2] using bond and bond angle restraints. All hydrogen atoms were kept in the positions calculated from the geometry and all atoms shared one isotropic ADP. The final refinement led to the  $R_{wp} = 3.6\%$ , see final profile fit in Figure SI 1.

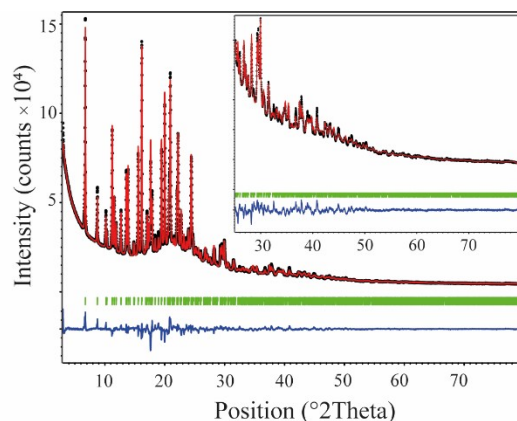

Figure SI 1. The final Rietveld profile fit of the XRPD of CBD-CR. Black dots represent measured data, red curve represents the calculated profile, blue line is a difference curve and green lines are Bragg's positions.

## SI 2 Nuclear magnetic resonance

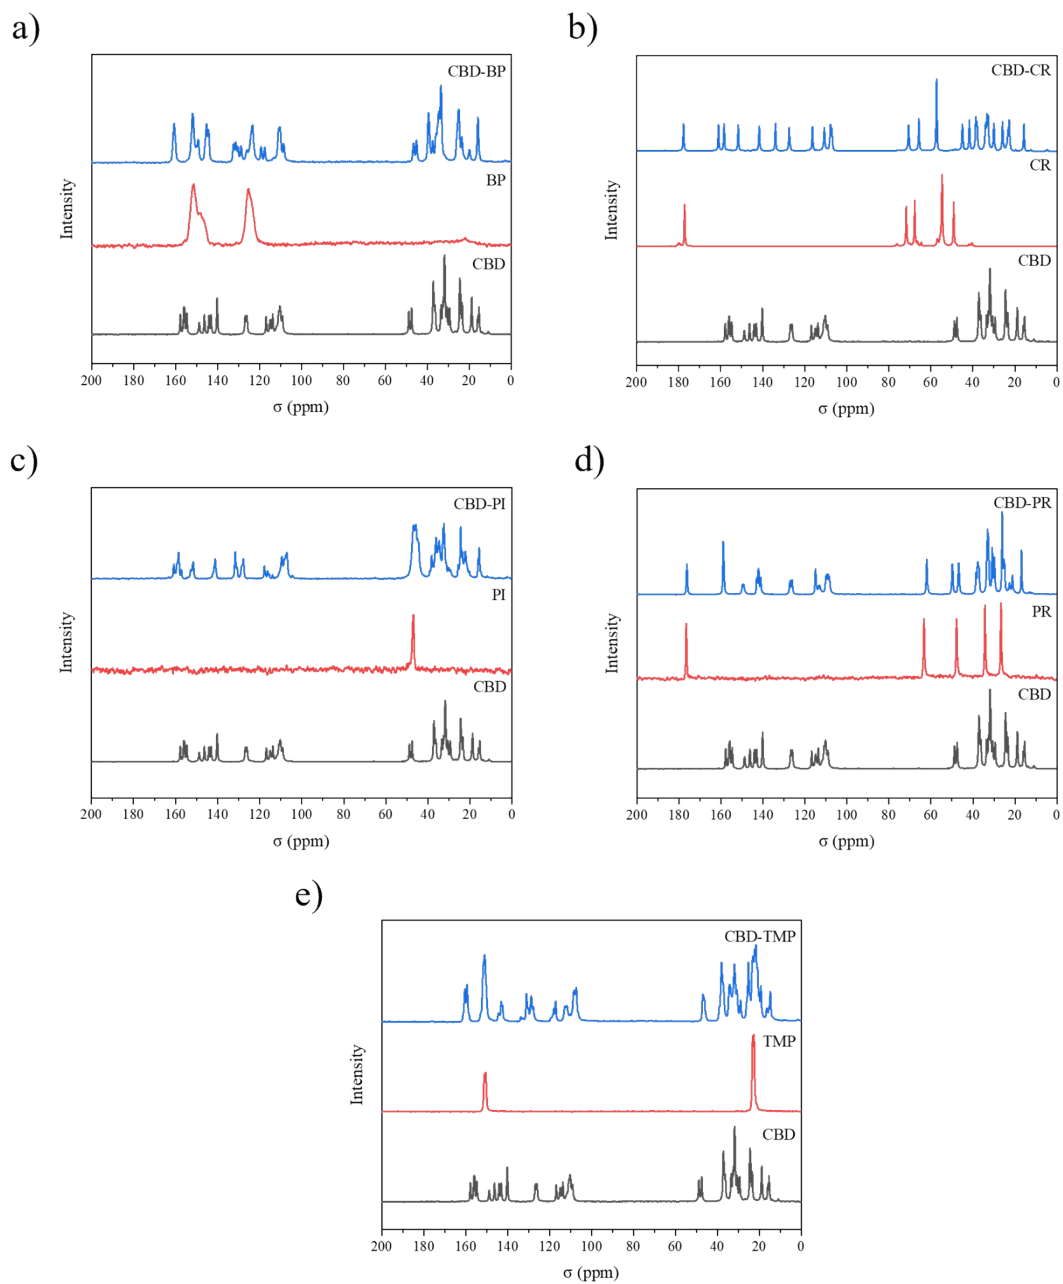

Figure SI 2. Solid-state NMR spectra of cocrystals a) CBD-BP, b) CBD-CR, c) CBD-PI, d) CBD-PR and e) CBD-TMP.

### SI 3 Crystals structures of the solid forms

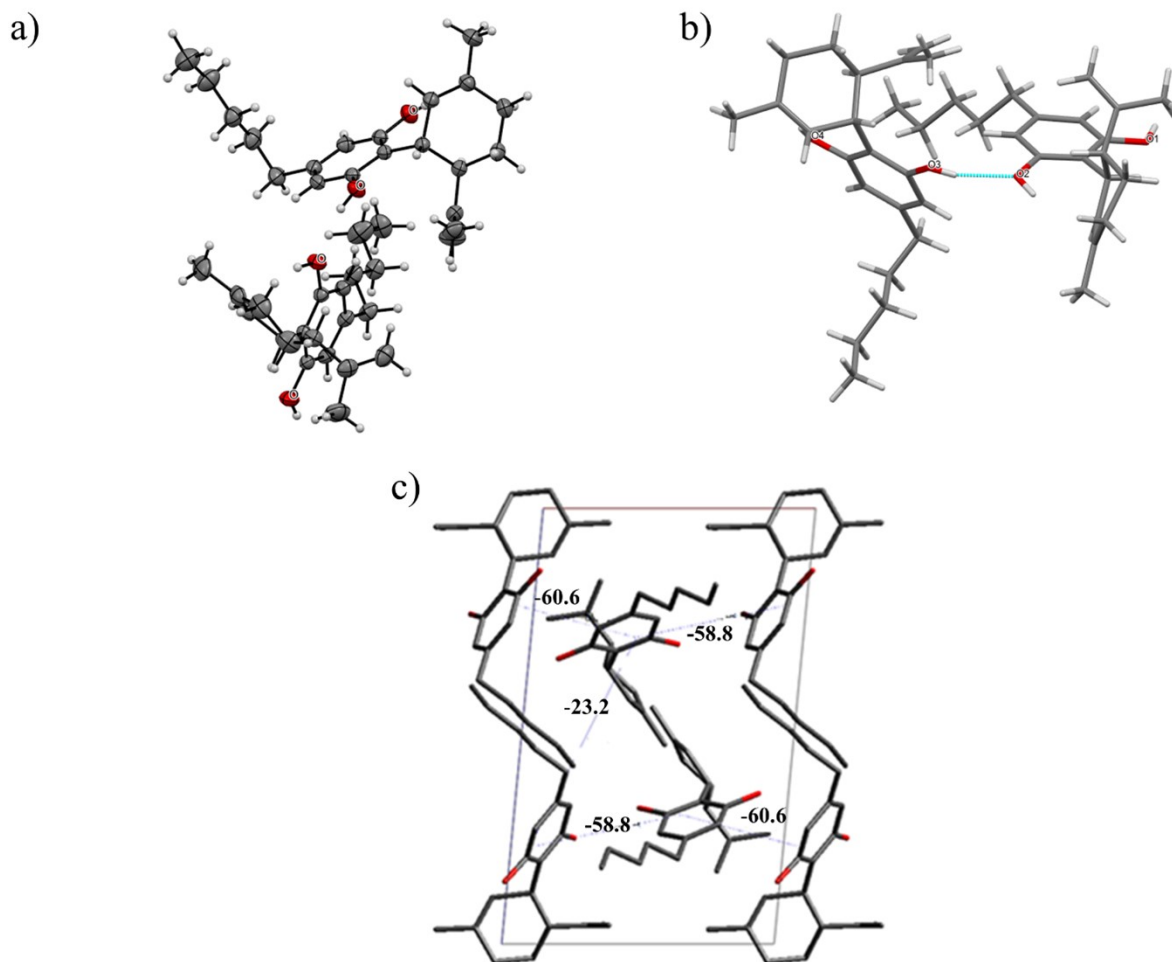

Figure SI 3. Crystal structure of CBD of a) asymmetric unit, b) hydrogen bonding and c) calculated interaction energy.

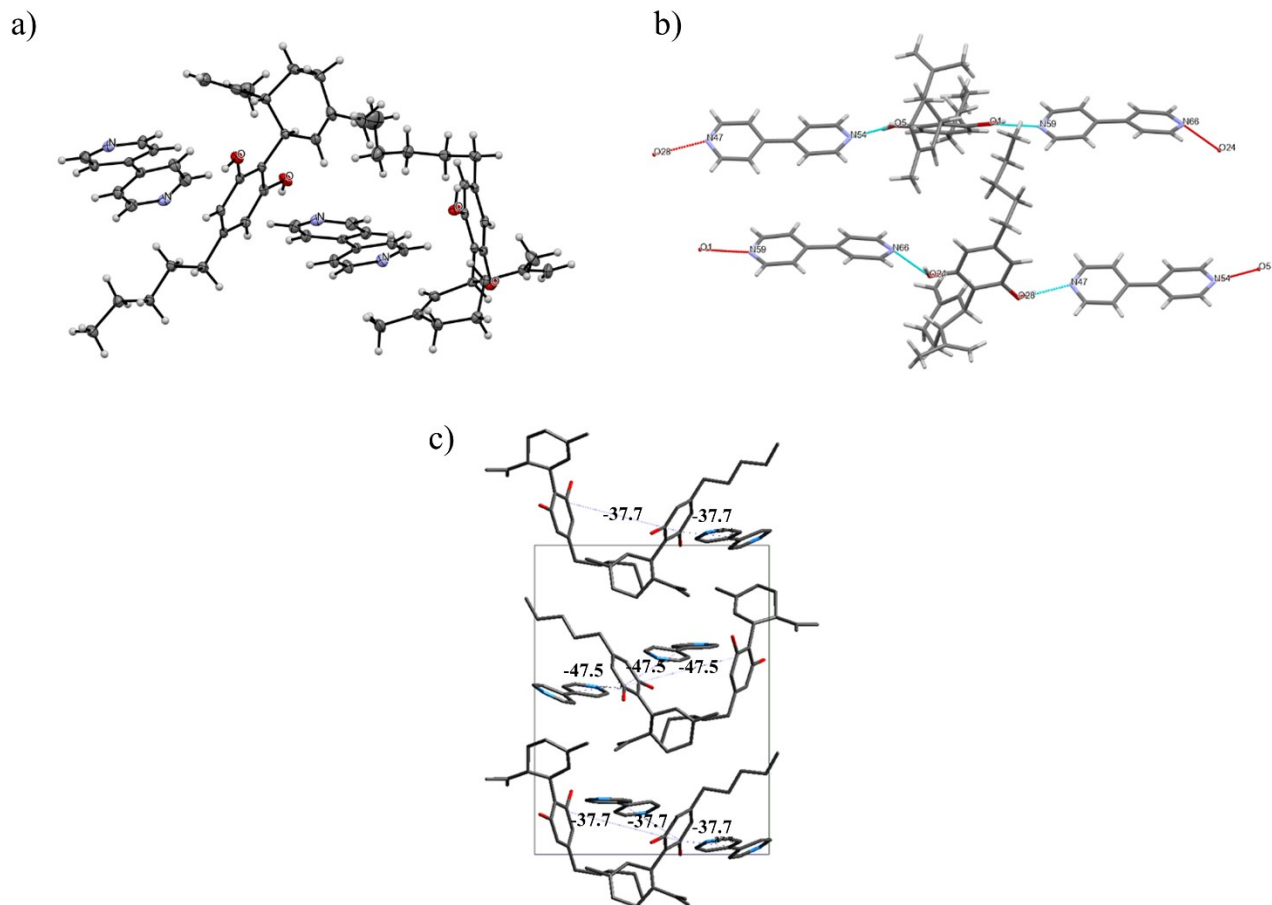

Figure SI 4. Crystal structure of CBD-BP of a) asymmetric unit, b) hydrogen bonding and c) calculated interaction energy.

a)

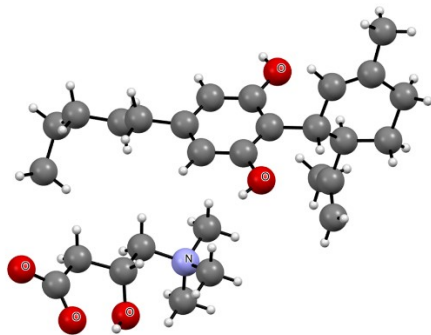

b)

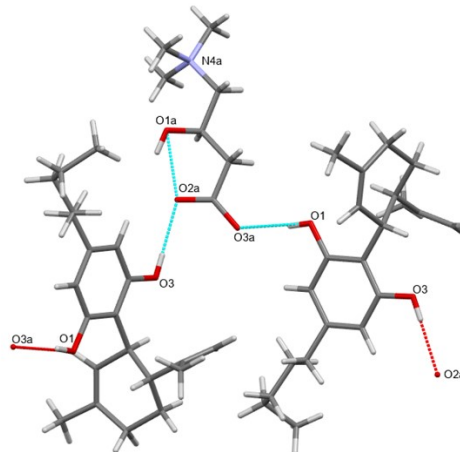

c)

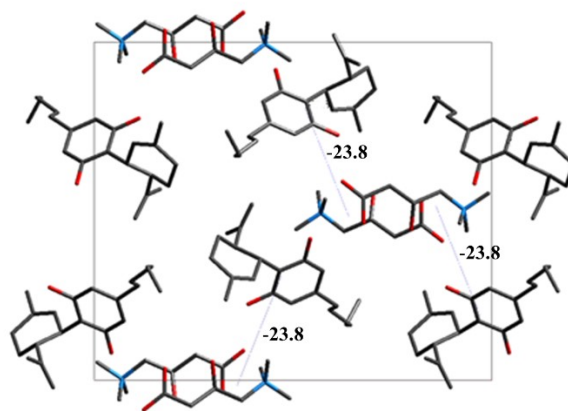

Figure SI 5. Crystal structure of CBD-CR of a) asymmetric unit, b) hydrogen bonding and c) calculated interaction energy.

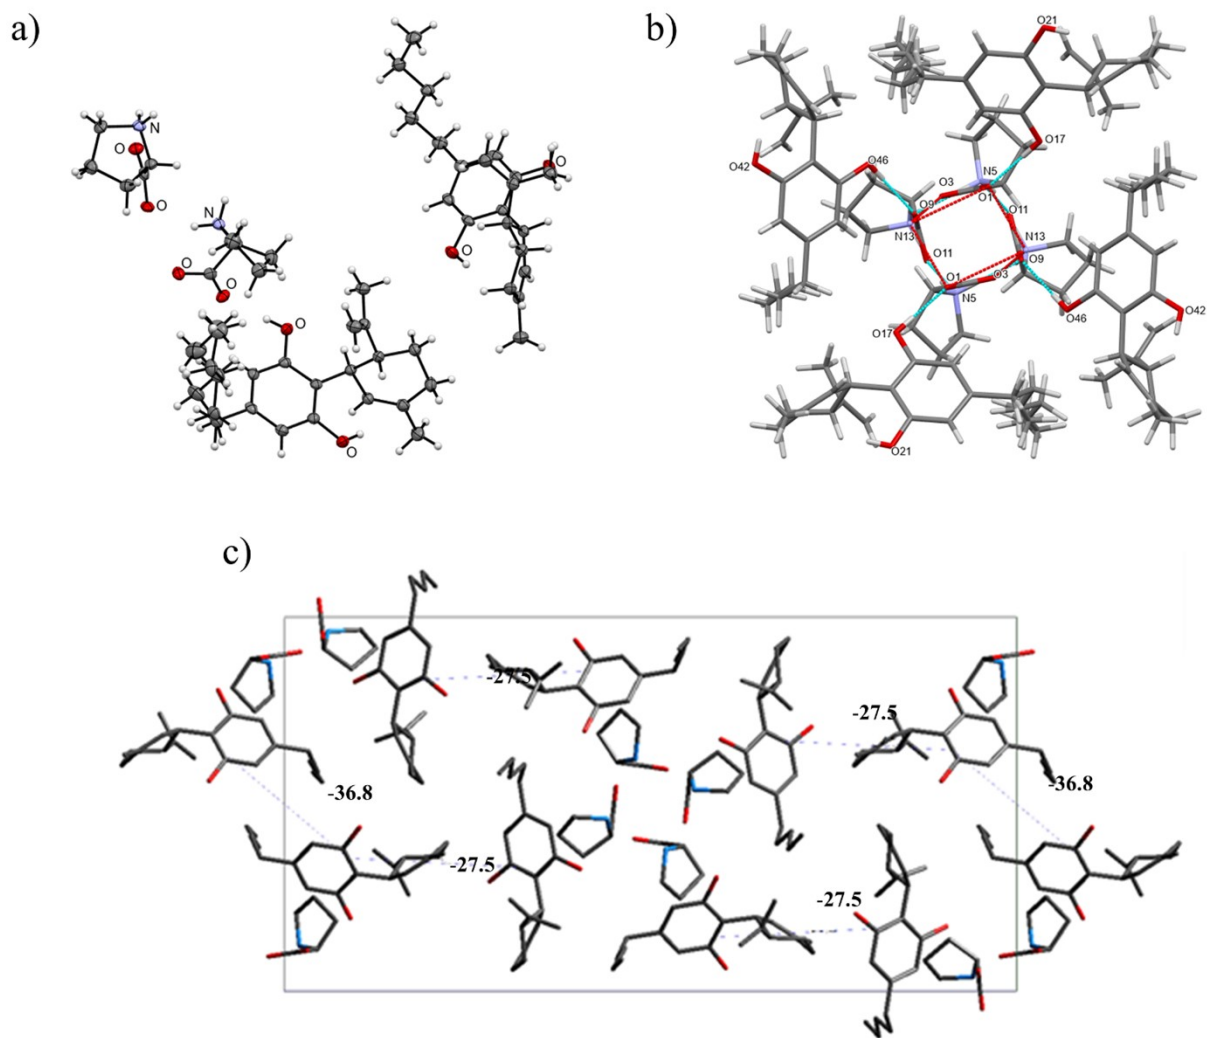

Figure SI 6. Crystal structure of CBD-PR of a) asymmetric unit, b) hydrogen bonding and c) calculated interaction energy.

## SI 4 Thermal analyses

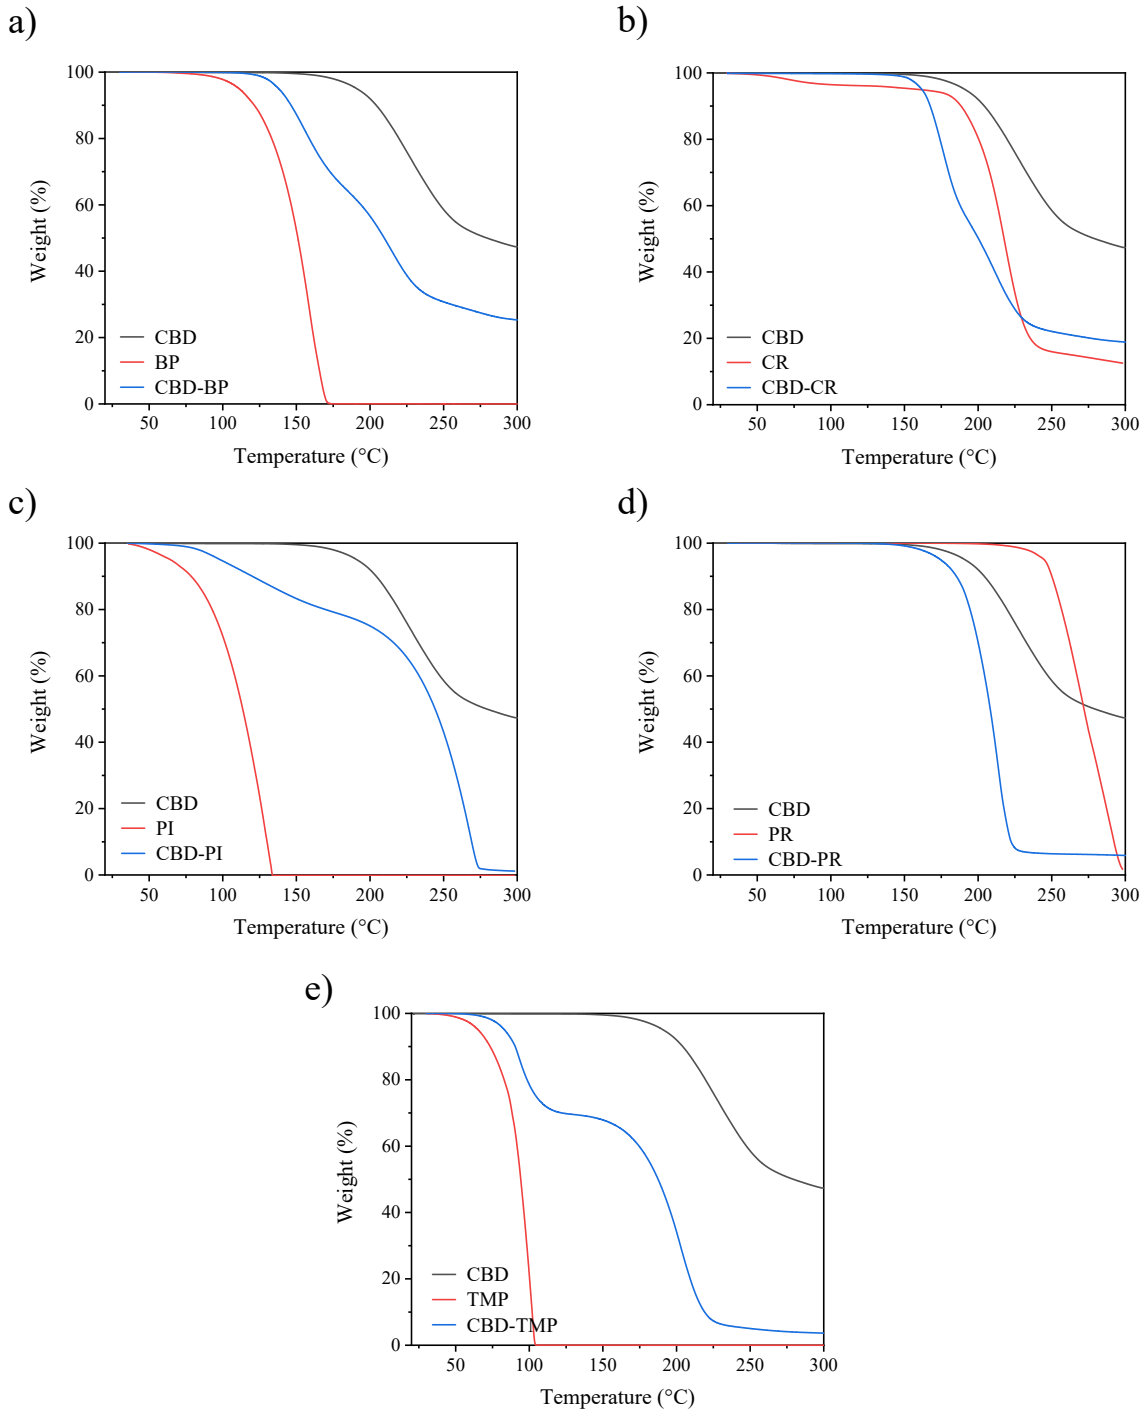

Figure SI 7. TGA curves for all cocrystals and their starting materials.



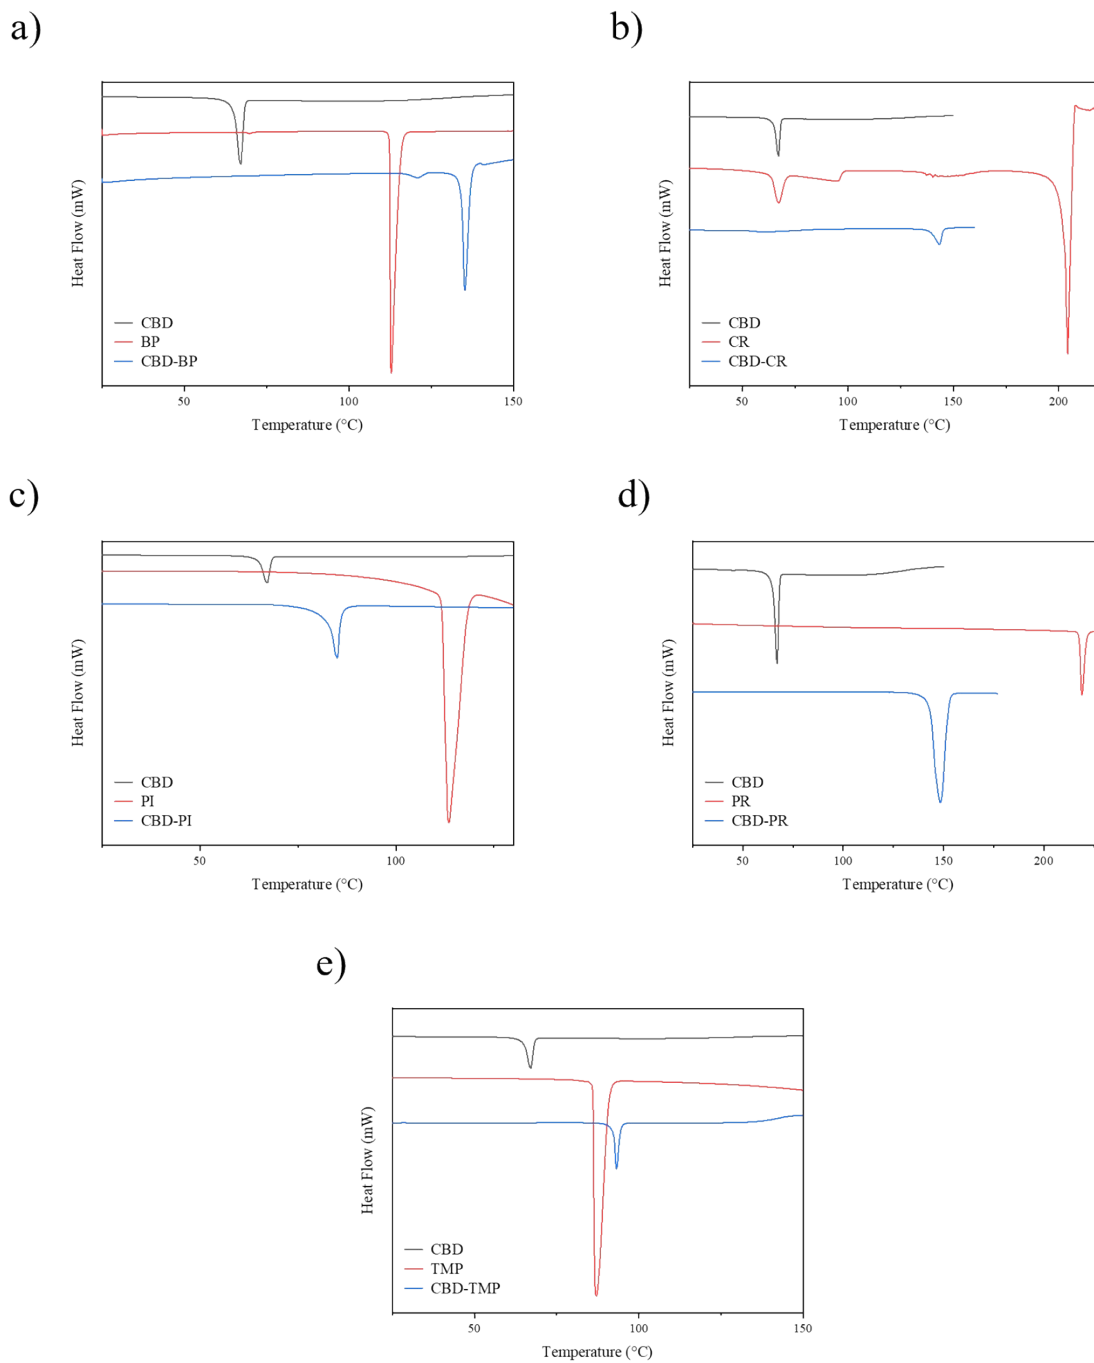

Figure SI 8. DSC curves for all cocrystals and their starting materials.

## SI 5 Intrinsic dissolution rate

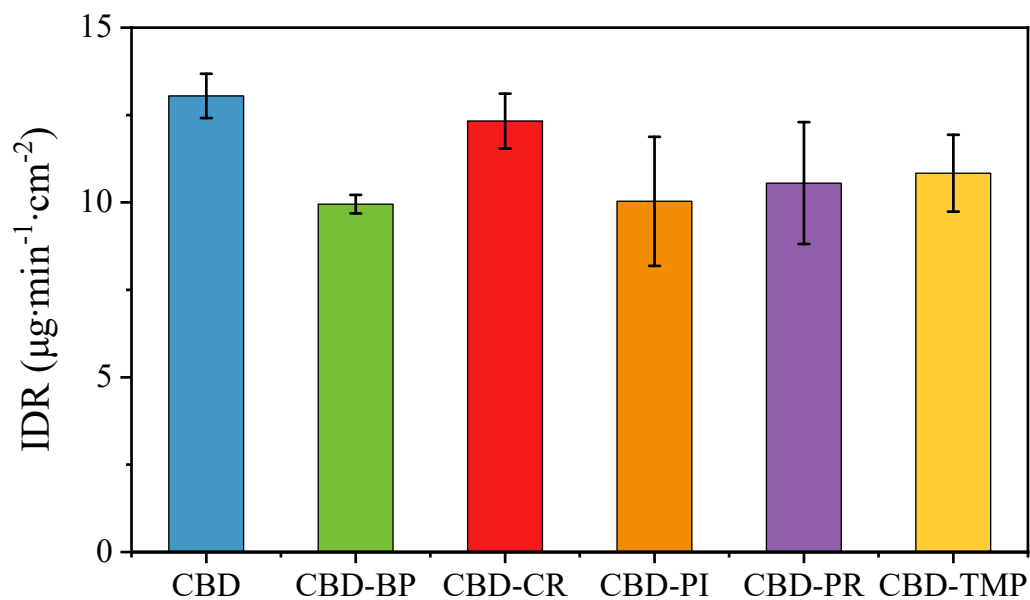

Figure SI 9. Comparison of intrinsic dissolution rates for pure CBD and its cocrystals.

Table SI 2. Intrinsic dissolution rate of the CBD and its cocrystals.

| Solid form | Average dissolution rate ( $\mu\text{g}\cdot\text{min}^{-1}\cdot\text{cm}^{-2}$ ) |
|------------|-----------------------------------------------------------------------------------|
| CBD        | 13.05 ± 0.32                                                                      |
| CBD-BP     | 9.95 ± 0.13                                                                       |
| CBD-CR     | 12.33 ± 0.39                                                                      |
| CBD-PI     | 10.03 ± 0.92                                                                      |
| CBD-PR     | 10.55 ± 0.87                                                                      |
| CBD-TMP    | 10.84 ± 0.55                                                                      |

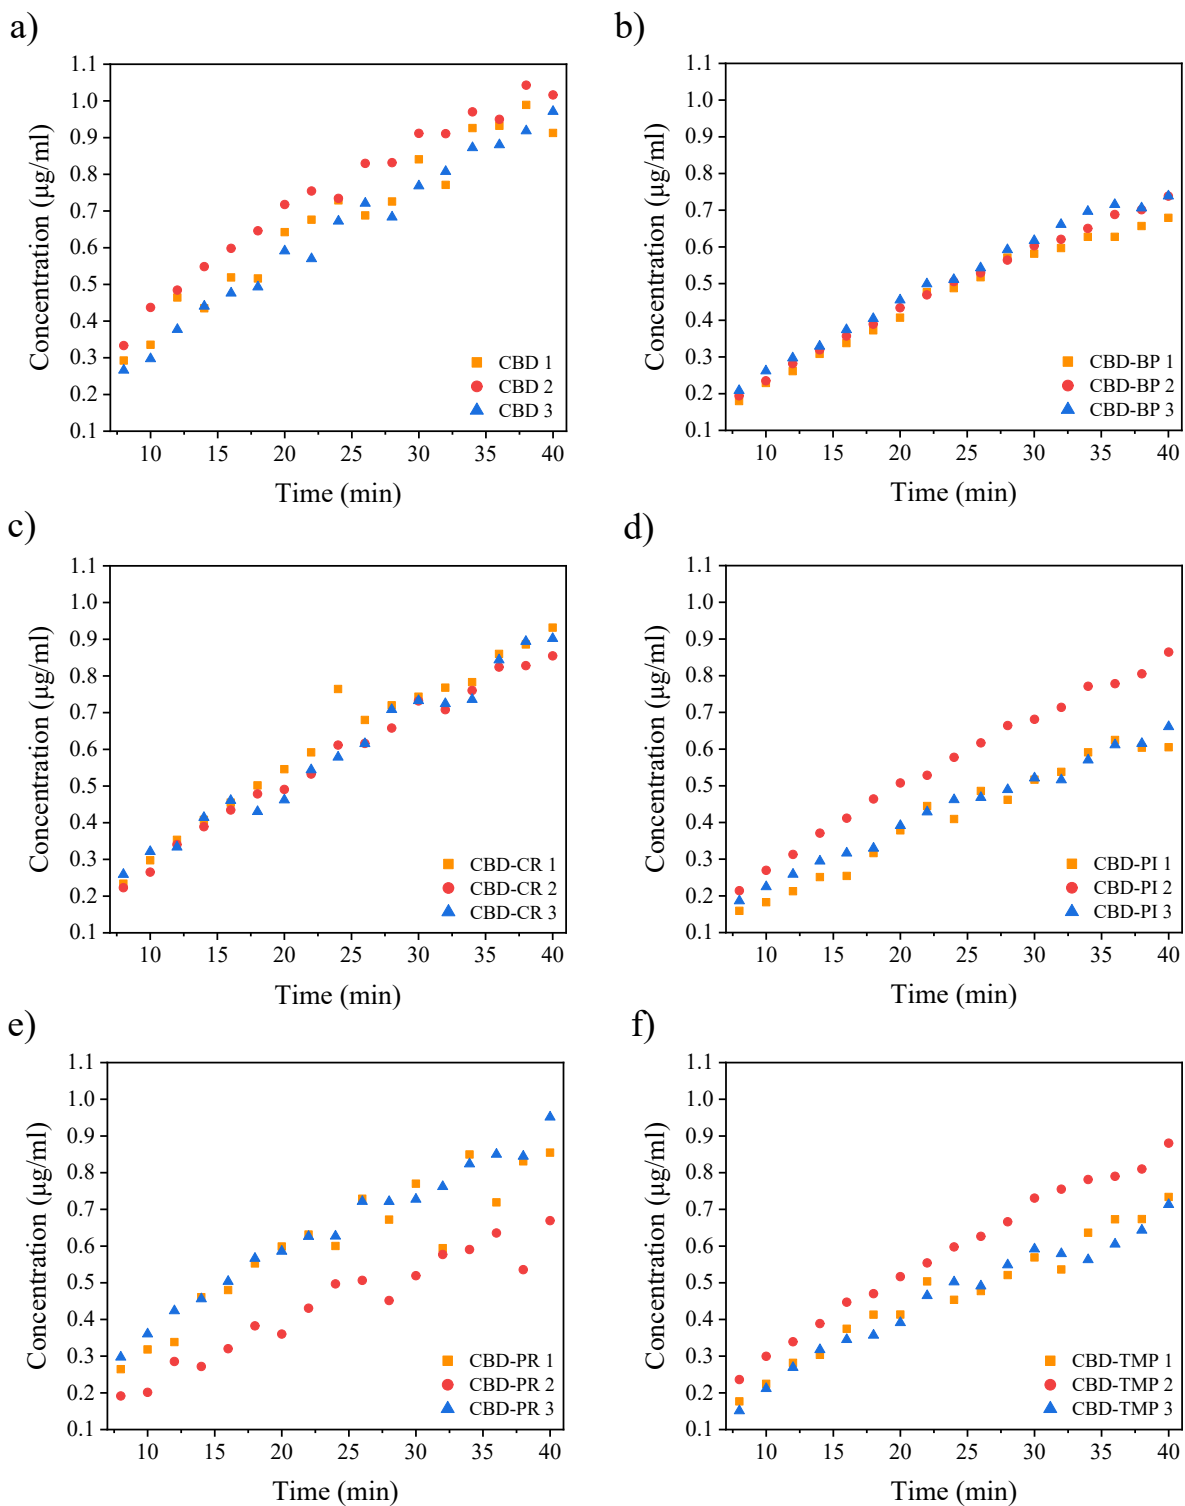

Figure SI 10. An example of dissolution rate profile of pure CBD and its cocrystals.

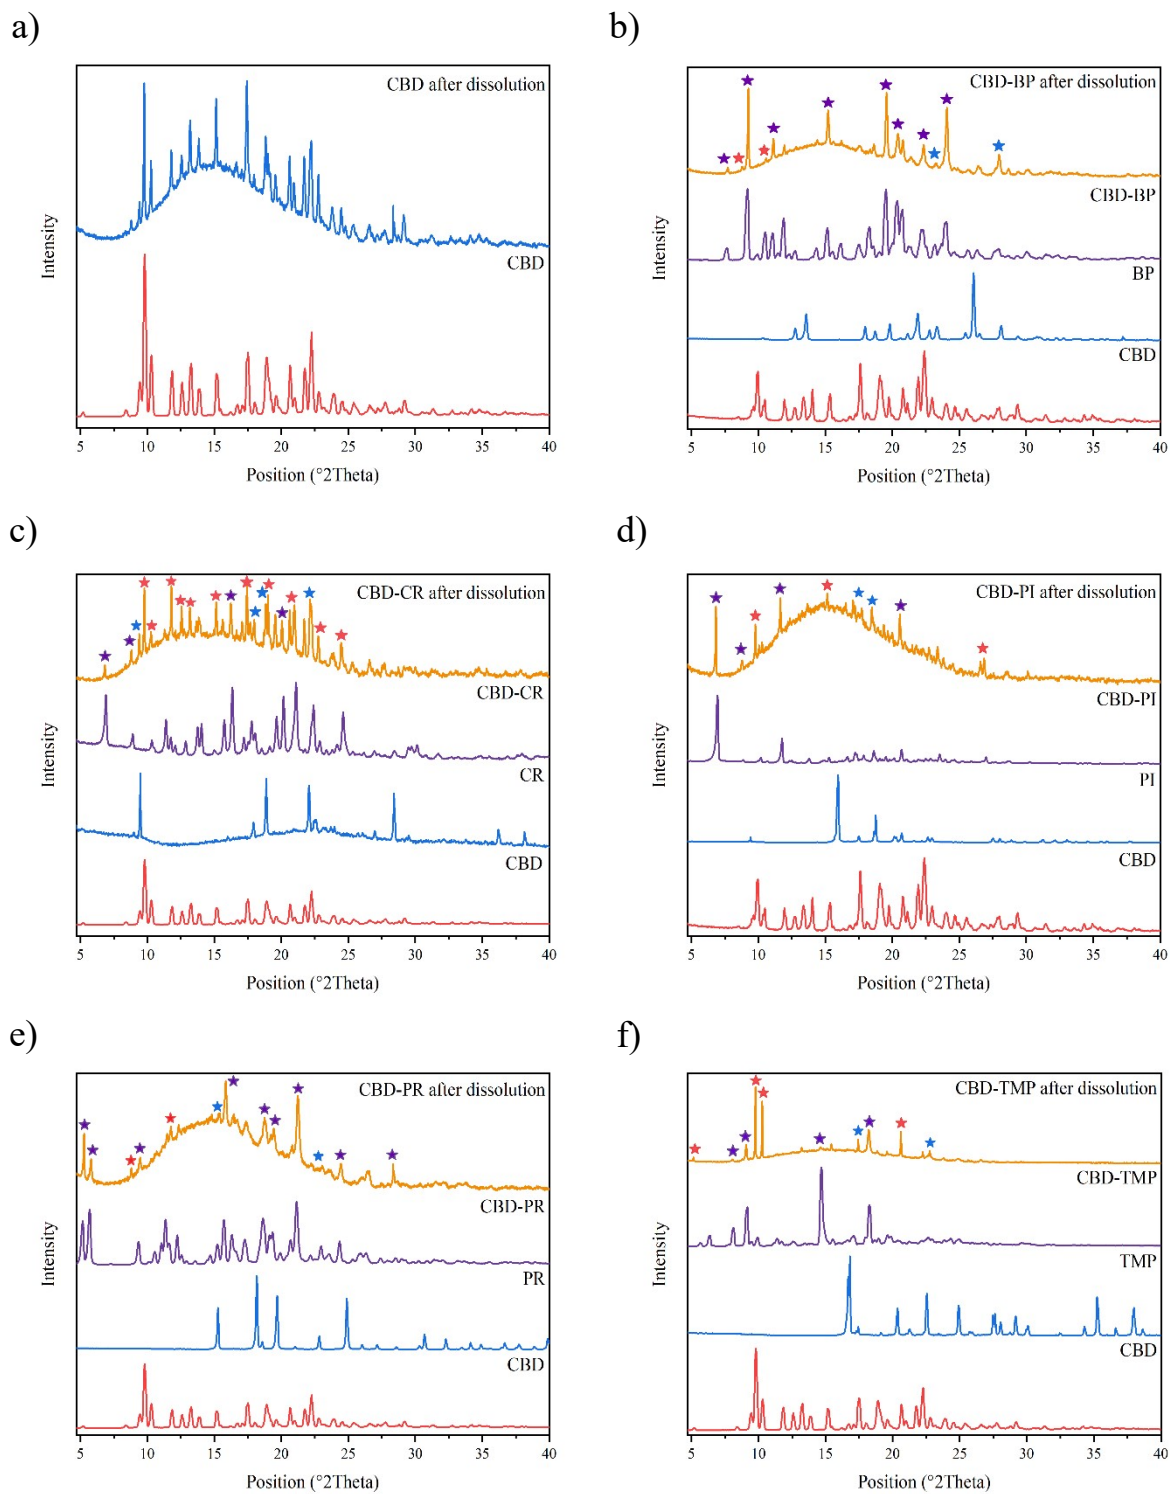

Figure SI 11. XRPD patterns after IDR measurement of a) CBD, b) CBD-BP, c) CBD-CR, d) CBD-PI, e) CBD-PR and f) CBD-TMP. Colour of the star represents the origin of the peak.

## SI 6 Stability study

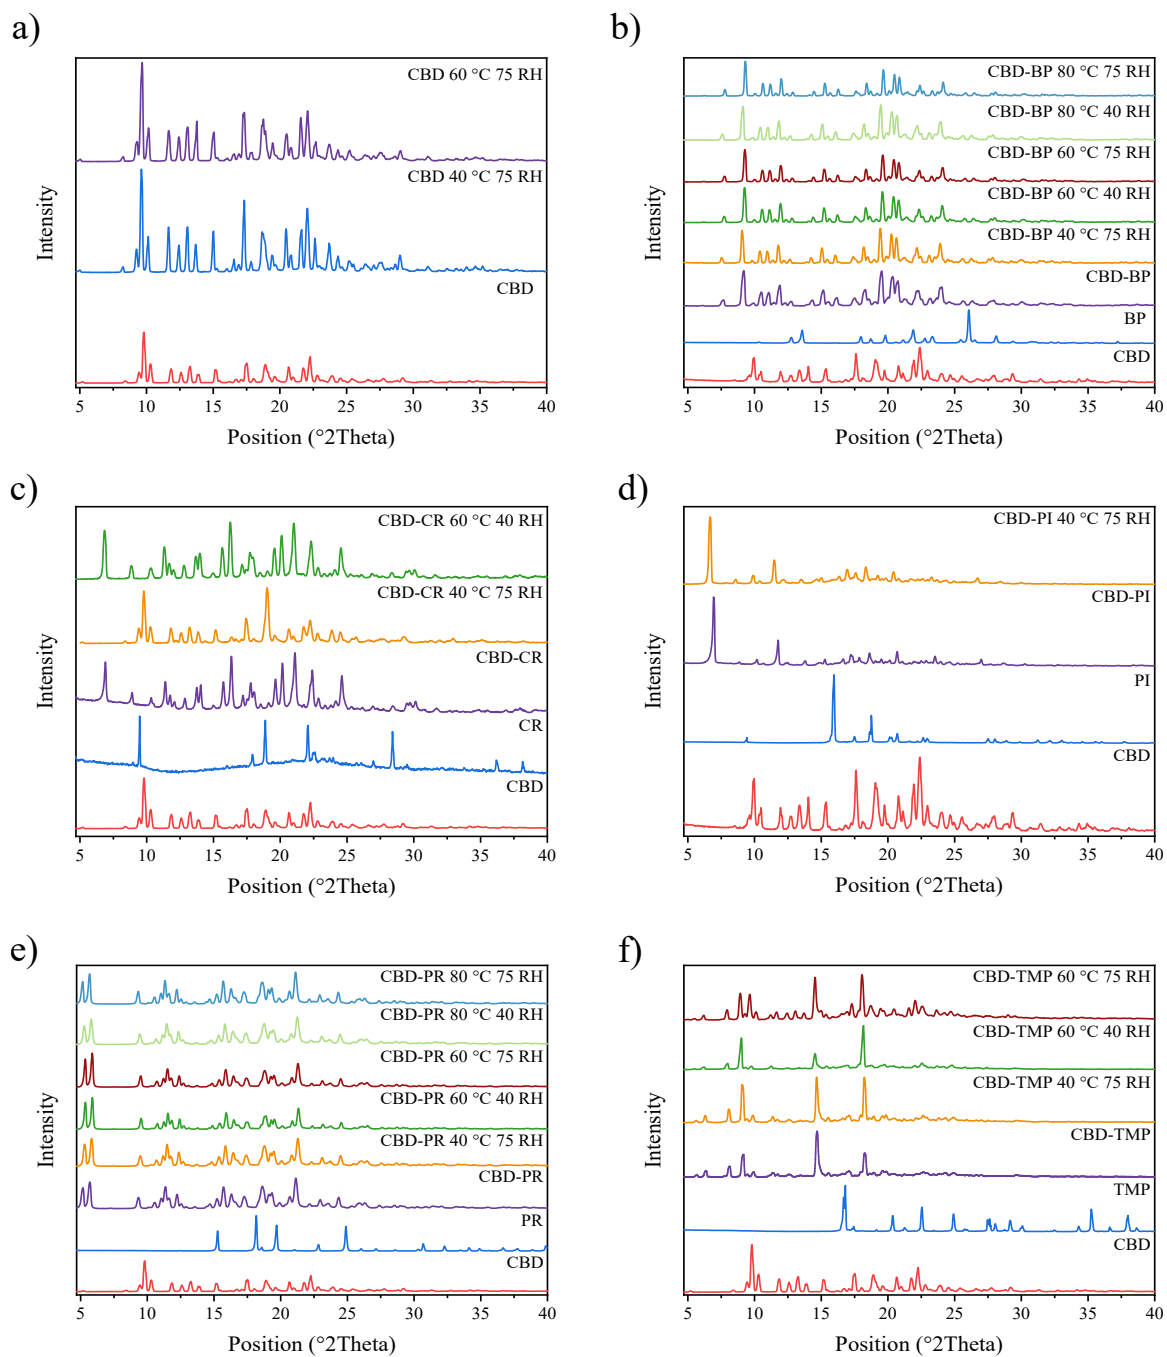

Figure SI 12. XRPD patterns of a) CBD, b) CBD-BP, c) CBD-CR, d) CBD-PI, e) CBD-PR and f) CBD-TMP.

## Literature

1. Favre-Nicolin, V. and R. Cerny, *FOX, 'free objects for crystallography': a modular approach to ab initio structure determination from powder diffraction*. Journal of Applied Crystallography, 2002. **35**(6): p. 734-743.
2. Petříček, V., et al., *Jana2020 – a new version of the crystallographic computing system Jana*. Zeitschrift für Kristallographie - Crystalline Materials, 2023. **238**(7-8): p. 271-282.
